# Supplementary material
Source: PubMed Central journal article supplement (PMC4817707)

**A**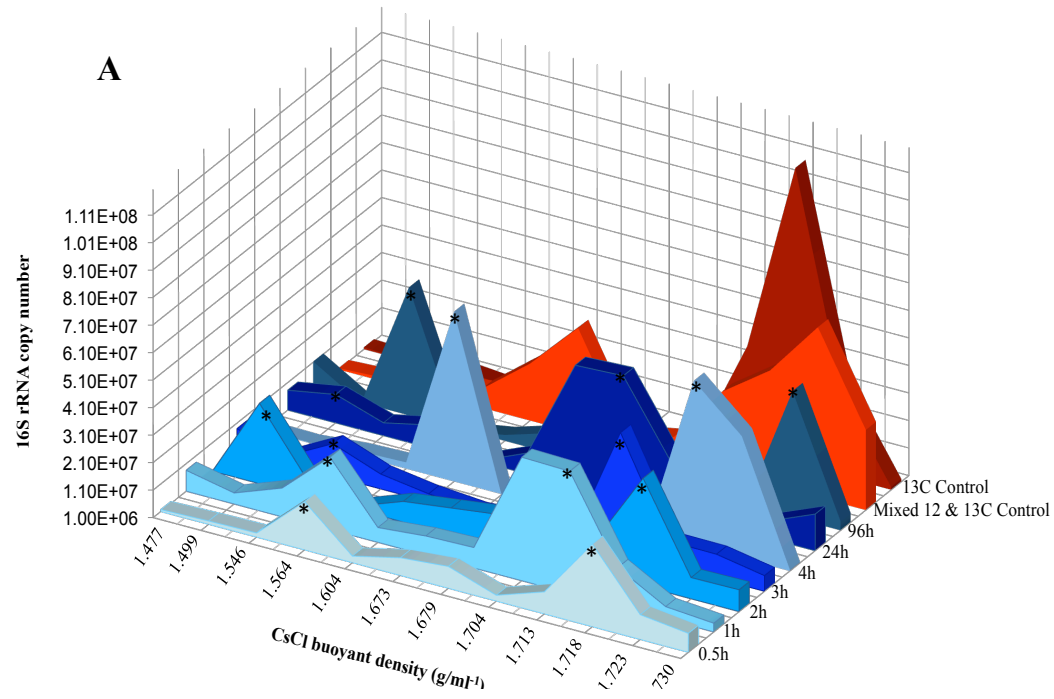**B**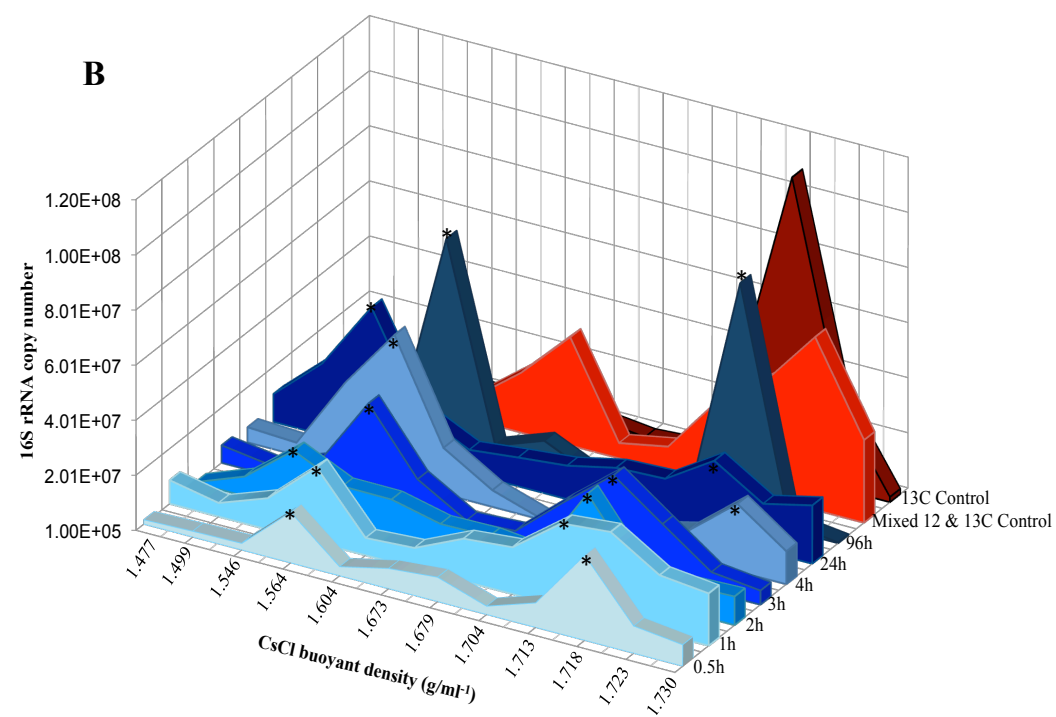**C**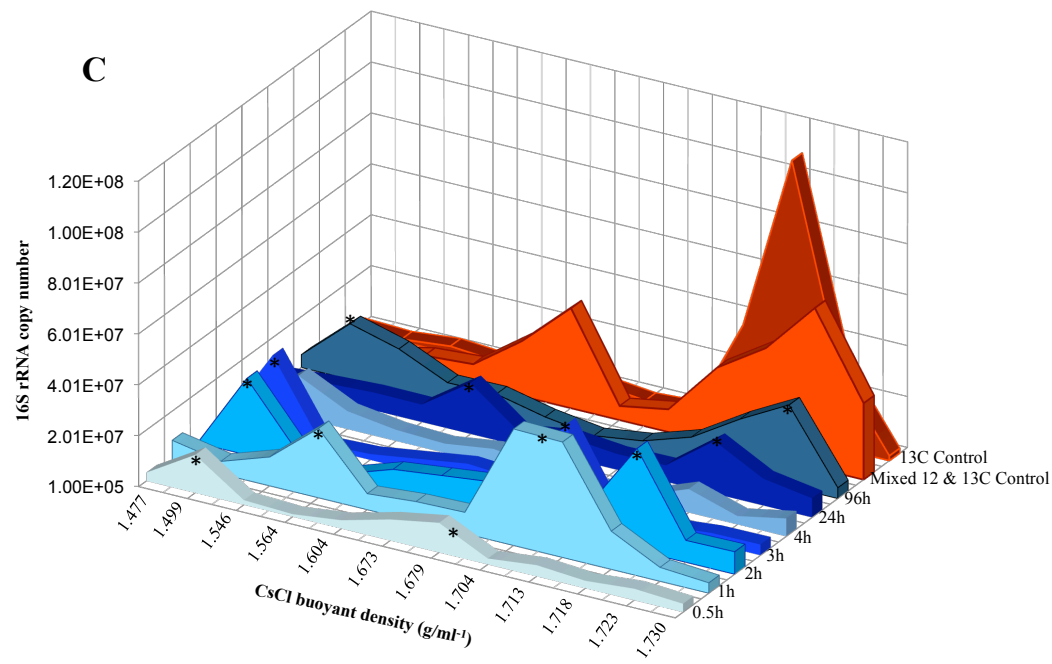**D**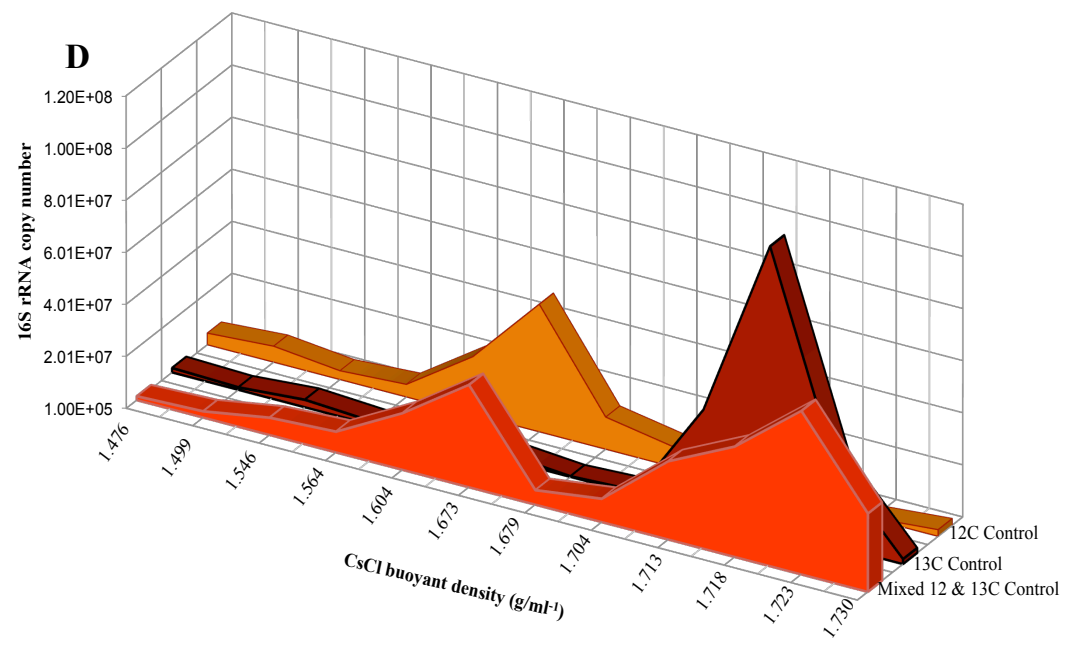

Supplement: ismej2014175x3.pdf [file ismej2014175x3.pdf]

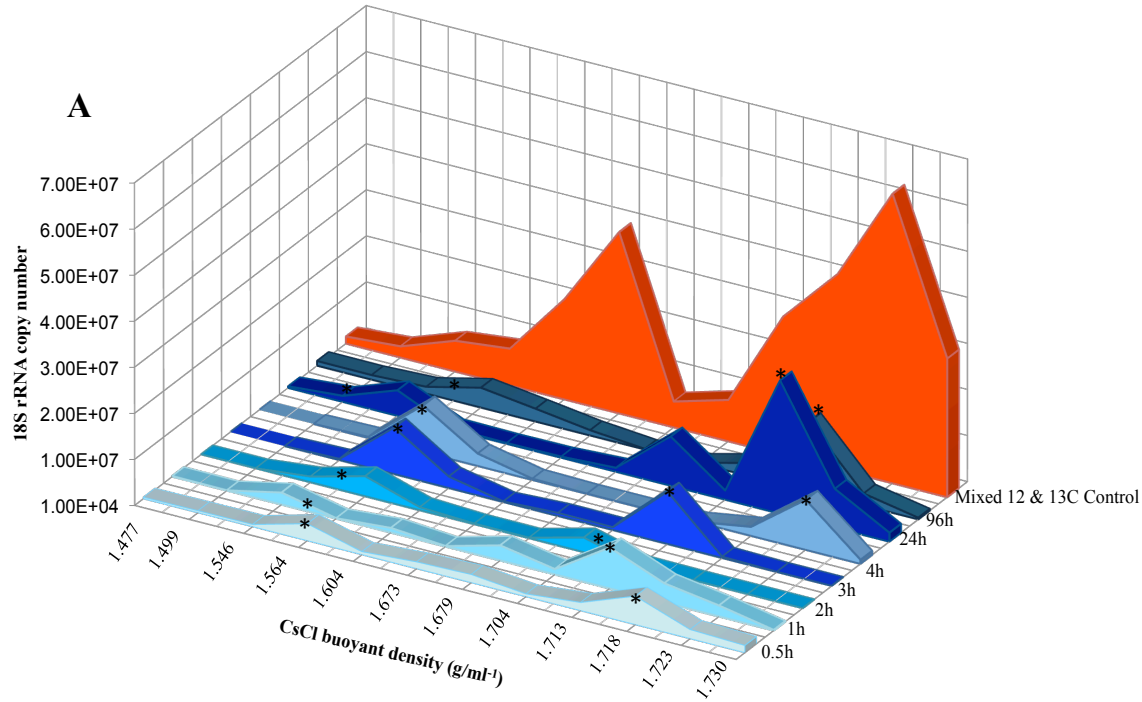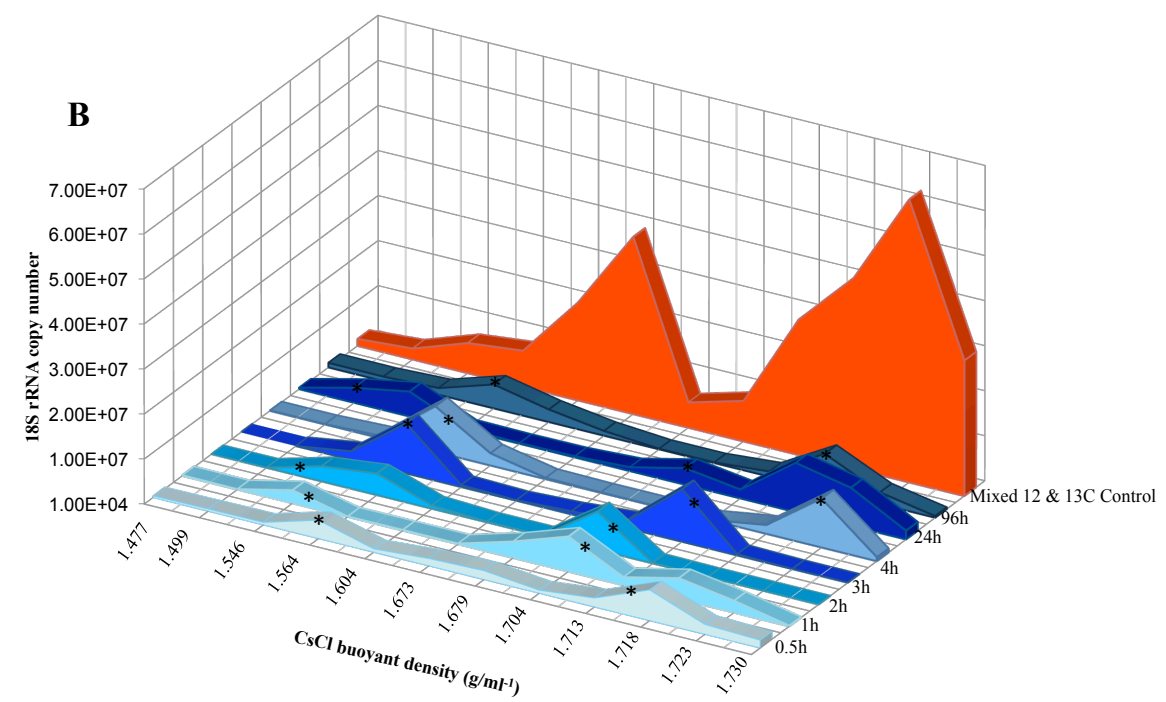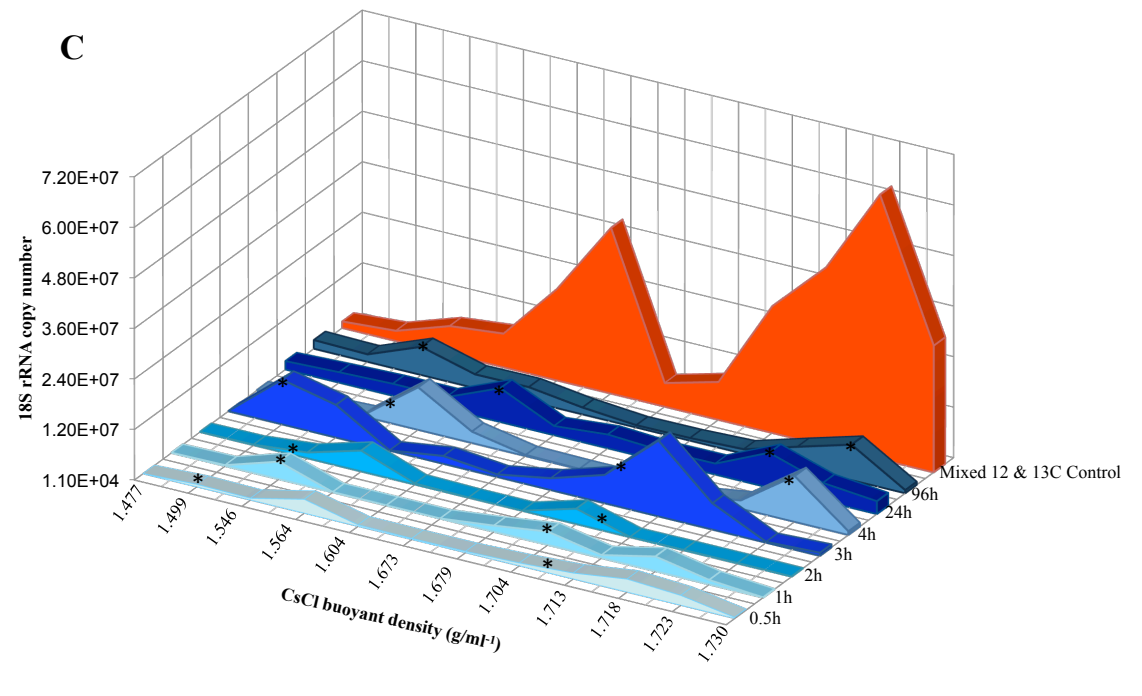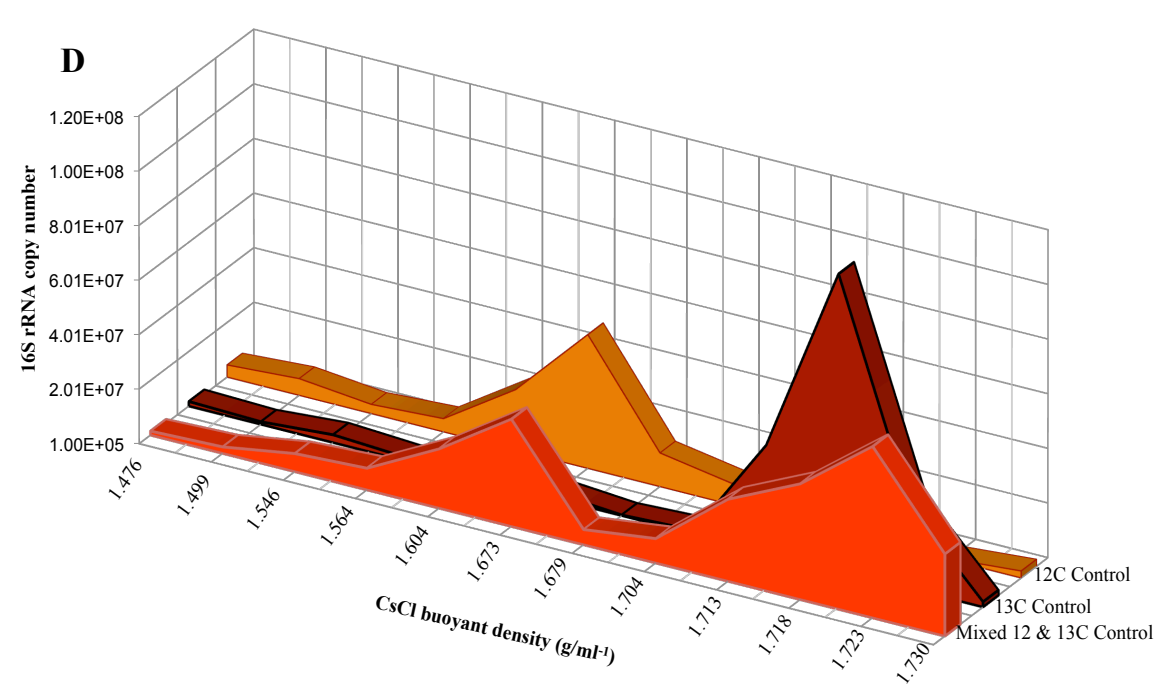

Supplement: ismej2014175x4.pdf [file ismej2014175x4.pdf]

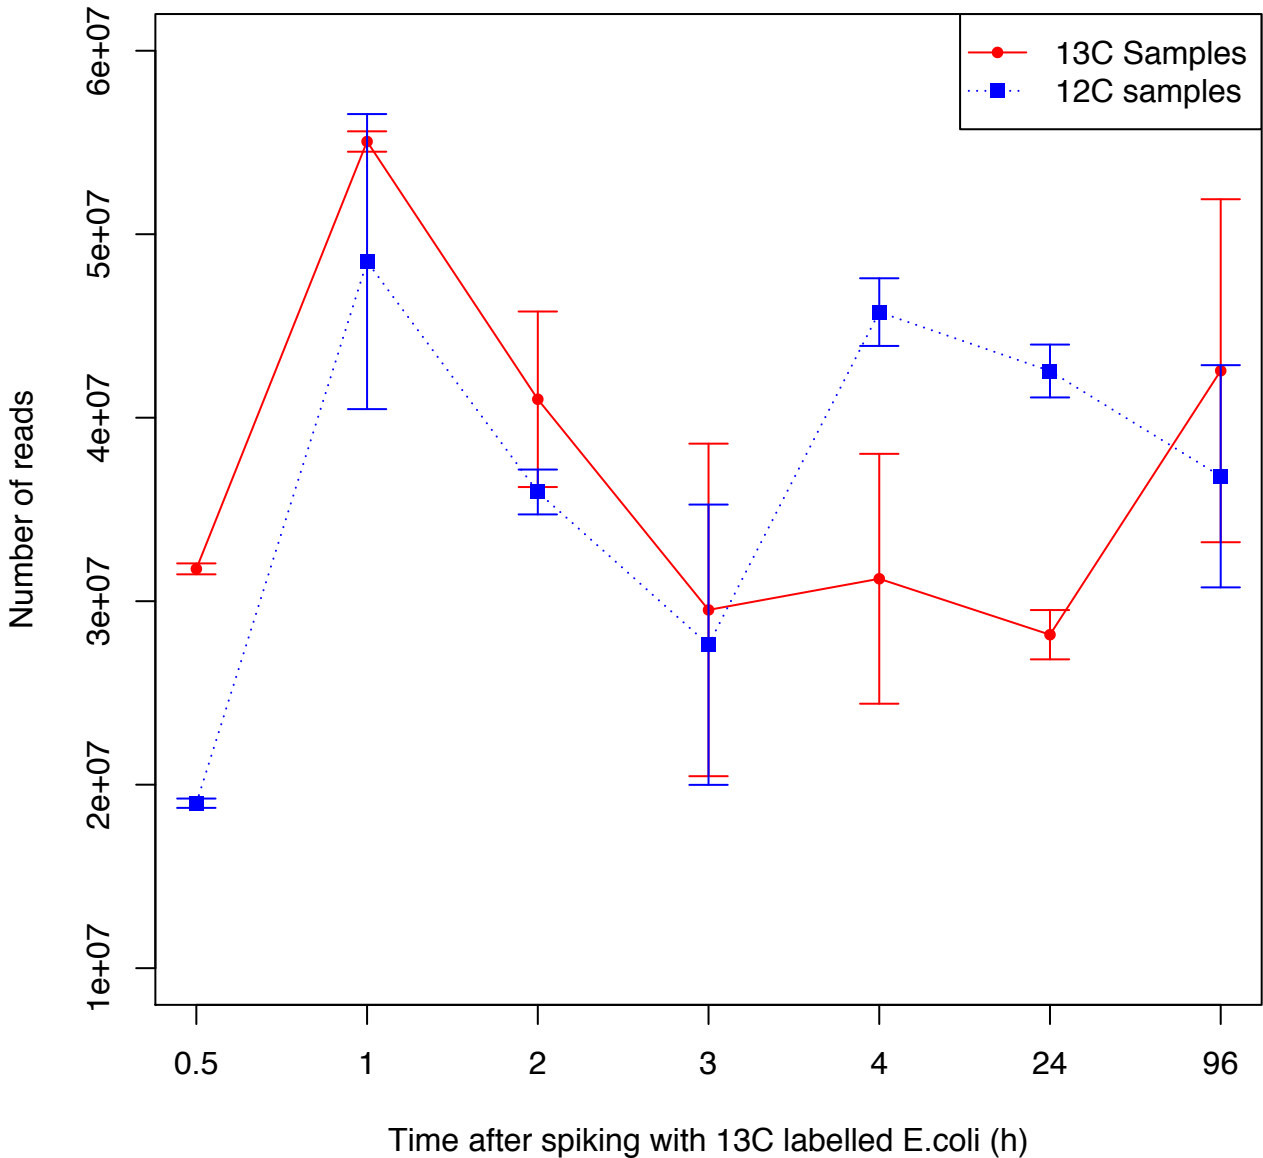

Supplement: ismej2014175x5.pdf [file ismej2014175x5.pdf]
